# Supplementary material
Source: publisher figshare collection journal article supplement (https://acs.figshare.com/ndownloader/files/4051063)
Supplement: Supplementary file 1 [file 4051063]

## Supporting Information

### Backbone-Branched DNA Building Blocks for Facile Angular Control in Nanostructures

Eduardo Paredes<sup>§</sup>, Xiaojuan Zhang<sup>‡</sup>, Harshad Ghodke<sup>□</sup>, Vamsi K. Yadavalli<sup>‡,\*</sup> and Subha R. Das<sup>§,\*</sup>

**Table S1.** DNA sequences used in this study.

| Name          | Sequence                                                                                           | Source      |
|---------------|----------------------------------------------------------------------------------------------------|-------------|
| <b>DNA1</b>   | 5'- ctc gat cgg tct ccA(2'- <i>O</i> -propargyl) gcc tgg -3'                                       | synthesized |
| <b>DNA2</b>   | 5'-N <sub>3</sub> - cac tag gcg cct agt g-3'                                                       | synthesized |
| <b>bbDNA3</b> | 5'- ctc gat cgg tct ccA(2'-cac tag gcg cct agt g) gcc tgg -3'                                      | CuAAC       |
| <b>DNA4</b>   | 5'-cca ggc tgg aga ccg atc gag-3'                                                                  | IDT         |
| <b>DNA5</b>   | 5'-acc gat cga gcc agg ctg gag-3'                                                                  | IDT         |
| <b>DNA6</b>   | 5'-cca ggc tgg aga ccg atc gag cca ggc tgg aga ccg atc gag -3'                                     | IDT         |
| <b>DNA7</b>   | 5'-cgc tagU(2'- <i>O</i> -propargyl)cat gca gU(2'- <i>O</i> -propargyl)ccacgc-3' <sup>a</sup>      | synthesized |
| <b>bbDNA8</b> | 5'-cgc tagU(2'- cac tag gcg cct agt g)cat gca gU(2'- cac tag gcg cct agt g)cca cgc-3' <sup>a</sup> | CuAAC       |
| <b>DNA9</b>   | 5'-gcg tgg act gca tga cta gcg -3'                                                                 | IDT         |
| <b>DNA10</b>  | 5'-cat gac tag cgg cgt gga cag -3'                                                                 | IDT         |
| <b>DNA11</b>  | 5'-gcg tgg act gca tga cta gcg gcg tgg act gca tga cta gcg -3'                                     | IDT         |

<sup>a</sup> The branching residue base is 'U' rather than 't' (i.e., 5-methyl-U) as the 2'-*O*-propargyl necessitates a ribosyl (RNA) phosphoramidite.

**Table S2.** Dihedrals between backbone extensions at the 2'-atom in B-form helix based on 10.5 residues per turn ( $360^\circ$ ) or helical pitch of  $34.29^\circ$  per residue. For angles greater than  $180^\circ$ ,  $\Theta$  is calculated in the other direction (i.e., the smaller angle corresponding to  $360-\Theta$ ). Thus for  $N = 7$ ,  $\Theta = 274.32^\circ \equiv (360-274.32) = 85.68^\circ$

| Number of<br>residues<br><i>between</i><br>branches (N) | Dihedral<br>between<br>branches<br>( $\Theta$ ; degrees) |
|---------------------------------------------------------|----------------------------------------------------------|
| 0                                                       | 34.29                                                    |
| 1                                                       | 68.57                                                    |
| 2                                                       | 102.86                                                   |
| 3                                                       | 137.14                                                   |
| 4                                                       | 171.43                                                   |
| 5                                                       | 154.29                                                   |
| 6                                                       | 120                                                      |
| 7                                                       | 85.68                                                    |
| 8                                                       | 51.39                                                    |
| 9                                                       | 17.10                                                    |
| 10                                                      | 17.10                                                    |
| 11                                                      | 51.39                                                    |
| 12                                                      | 85.68                                                    |
| 13                                                      | 120                                                      |
| 14                                                      | 154.29                                                   |
| 15                                                      | 171.43                                                   |
| 16                                                      | 137.14                                                   |
| 17                                                      | 102.86                                                   |
| 18                                                      | 68.57                                                    |
| 19                                                      | 34.29                                                    |
| 20                                                      | 0                                                        |

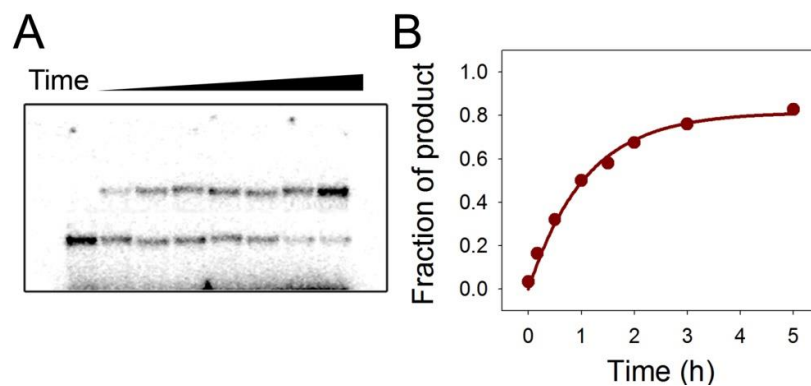

**Figure S1.** Optimizing timing for the click-branching reaction to obtain **bbDNA3**. **A.** A 20% polyacrylamide (8M urea) gel used to resolve click branching reaction mixtures over time. The **bbDNA3** (upper band) forms with disappearance of **DNA1** over time (t= 0 to 5hrs). **B.** Graph of **bbDNA3** formed over time as quantified from the gel, indicates maximal labeling is achieved in 3h with marginal improvement after 2 h.

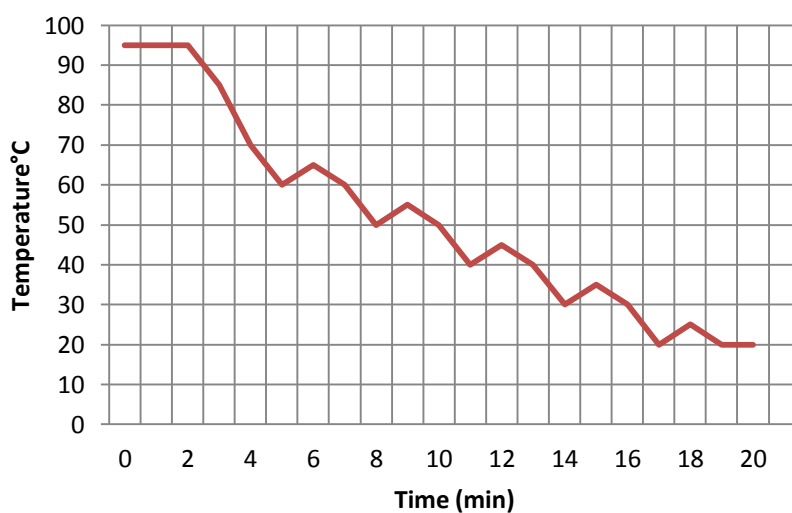

**Figure S2.** Time-temperature trace of the step-wise annealing for nanoassembly formation.

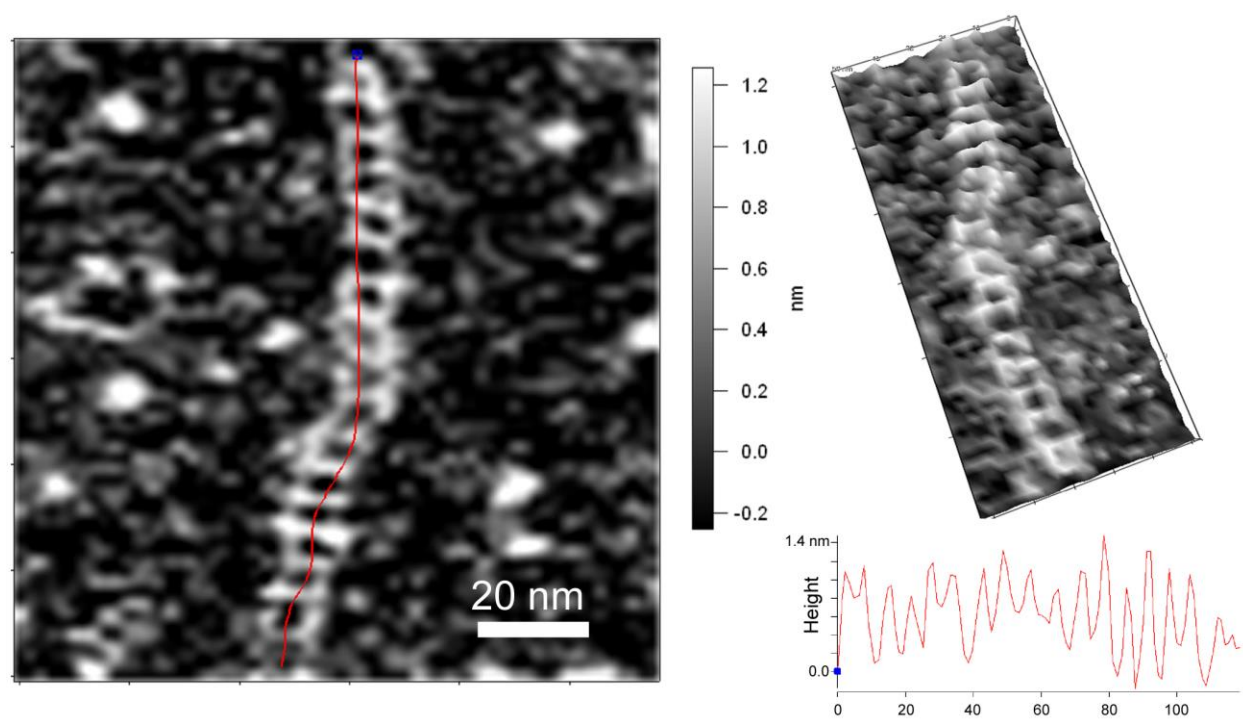

**Figure S3.** AFM scans of DNA nanoassembly based on co-planar branches and associated line profile

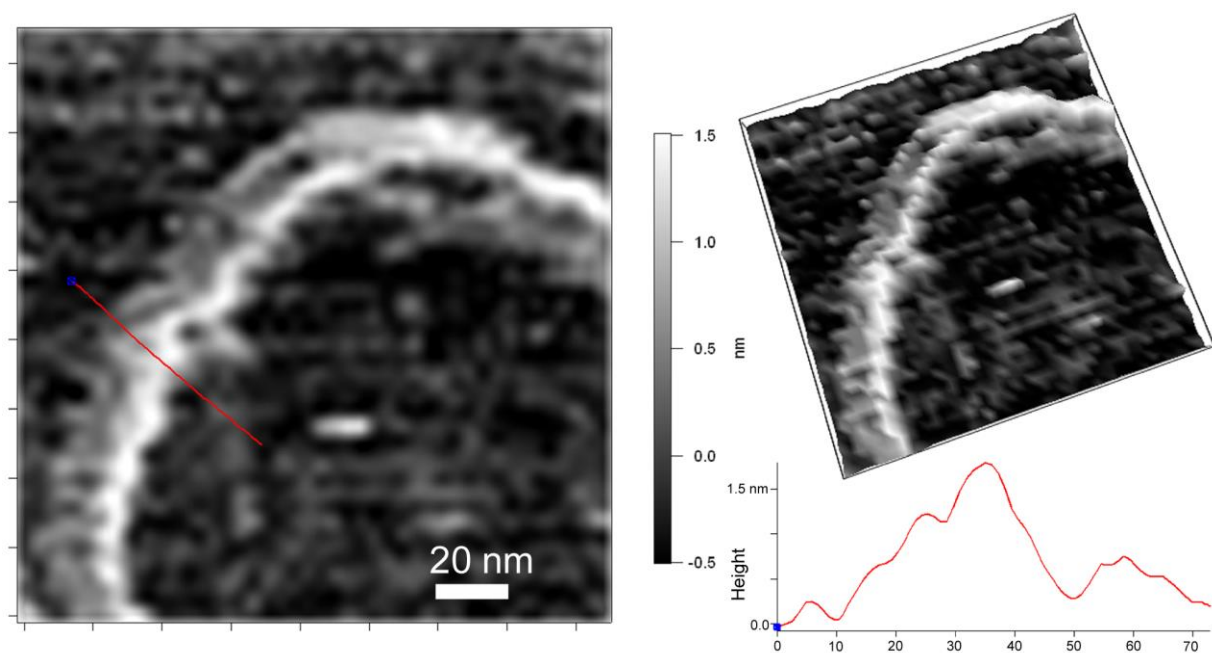

**Figure S4.** AFM scans of DNA nanoassembly based on dual perpendicular branches and associated line profile.
